# Supplementary material for: NASH-related increases in plasma bile acid levels depend on insulin resistance
Source: PubMed Central journal article supplement — JHEP Rep. 2020 Dec 16;3(2):100222. doi: 10.1016/j.jhepr.2020.100222 (PMC7878982; doi:10.1016/j.jhepr.2020.100222), 2020-12-16
Supplement: mmc1.pdf [file mmc1.pdf]

# **NASH-related increases in plasma bile acid levels depend on insulin resistance**

Guillaume Grzych, Oscar Chávez-Talavera, Amandine Descat, Dorothée Thuillier,  
An Verrijken, Mostafa Kouach, Vanessa Legry, Hélène Verkindt, Violeta Raverdy,  
Benjamin Legendre, Robert Caiazzo, Luc Van Gaal, Jean-Francois Goossens,  
Réjane Paumelle, Sven Francque, François Pattou, Joel T. Haas, Anne Tailleux, Bart  
Staels

## Table of contents

|              |   |
|--------------|---|
| Fig. S1..... | 2 |
| Fig. S2..... | 3 |
| Fig. S3..... | 4 |

**Selection Criteria:**

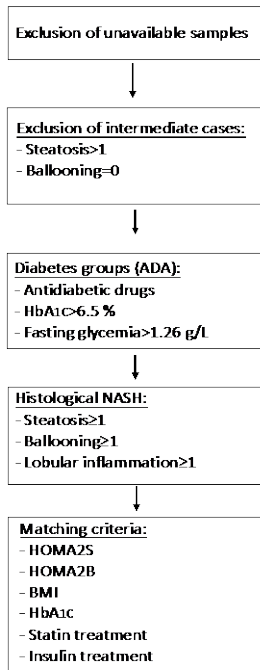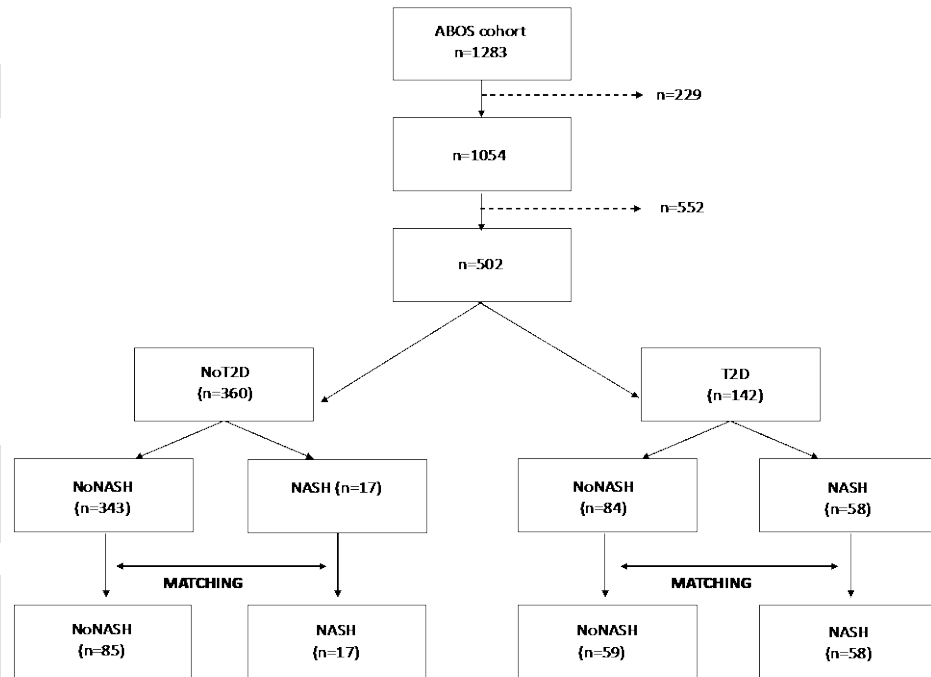

**Fig. S1. Patient selection flowchart**

In the whole cohort (n=1283), 1054 patients had sufficient blood and liver sample to perform assays. To determine the specific influence of NASH, excluding isolated steatosis, on plasma BAs, we excluded patients with isolated steatosis >1 (NAFL) and/or some degree of ballooning or lobular inflammation but insufficient to qualify for the diagnosis of NASH. Then, the 502 remaining patients were separated in T2D and No-T2D groups. Within these 2 groups (No-T2D and T2D), patients were classified in No-NASH and NASH groups according to liver biopsy scoring. Finally, we matched each subgroup of patients by HOMA2S, HOMA2B, BMI, HbA<sub>1c</sub> and insulin/statin treatment to obtain homogeneous groups on these parameters.

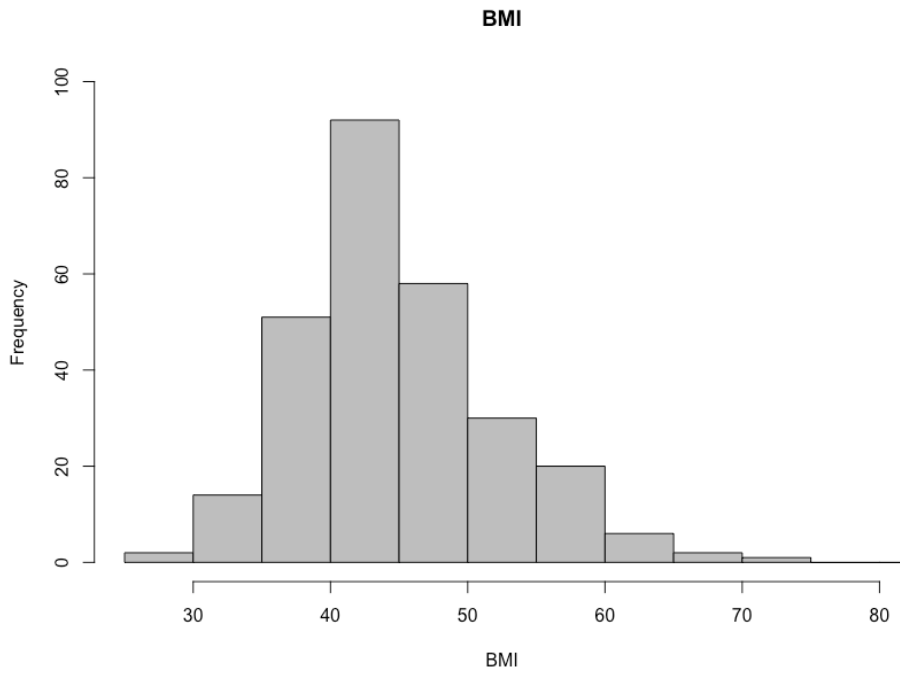

**Fig. S2. BMI distribution in the combined cohort (n=239).**

| <b>Bile acid cluster</b>    | <b>Acronym and definition</b>                                                                       |
|-----------------------------|-----------------------------------------------------------------------------------------------------|
| Free cholic acid            | CA (I)                                                                                              |
| Free chenodeoxycholic acid  | CDCA (I)                                                                                            |
| Free hyocholic acid         | HCA (I)                                                                                             |
| Free deoxycholic acid       | DCA (II)                                                                                            |
| Free lithocholic acid       | LCA (II)                                                                                            |
| Free ursodeoxycholic acid   | UDCA (II)                                                                                           |
| Free hyodeoxycholic acid    | HDCA (II)                                                                                           |
| Glyco-cholic acid           | GCA (I)                                                                                             |
| Glyco-chenodeoxycholic acid | GCDCA (I)                                                                                           |
| Glyco-deoxycholic acid      | GDCA (II)                                                                                           |
| Glyco-lithocholic acid      | GLCA (II)                                                                                           |
| Glyco-ursodeoxycholic acid  | GUDCA (II)                                                                                          |
| Glyco-hyocholic acid        | GHCA (I)                                                                                            |
| Glyco-hyodeoxycholic acid   | GHDCA (II)                                                                                          |
| Tauro-cholic acid           | TCA (I)                                                                                             |
| Tauro-chenodeoxycholic acid | TCDCA (I)                                                                                           |
| Tauro-deoxycholic acid      | TDCA (II)                                                                                           |
| Tauro-lithocholic acid      | TLCA (II)                                                                                           |
| Tauro-ursodeoxycholic acid  | TUDCA (II)                                                                                          |
| Tauro-hyocholic acid        | THCA (I)                                                                                            |
| Tauro-hyodeoxycholic acid   | THDCA (II)                                                                                          |
| Total CA                    | CA + GCA + TCA                                                                                      |
| Total CDCA                  | CDCA + GCDCA + TCDCA                                                                                |
| Total DCA                   | DCA + GDCA + THCA                                                                                   |
| Total LCA                   | LCA + GLCA + TLCA                                                                                   |
| Total UDCA                  | UDCA + GUDCA + TUDCA                                                                                |
| Total HCA                   | HCA + GHCA + THCA                                                                                   |
| Total HDCA                  | HDCA + GHDCA + THDCA                                                                                |
| Total primary BAs           | Total CA + Total CDCA + Total HCA                                                                   |
| Total secondary BAs         | Total DCA + Total LCA + Total UDCA + Total HDCA                                                     |
| Total free BAs              | CA + CDCA + DCA + LCA + UDCA + HCA + HDCA                                                           |
| Total conjugated            | GCA + GCDCA + GDCA + GLCA + GUDCA + GHCA + GHDCA + TCA + TCDCA + TDCA + TLCA + TUDCA + THCA + THDCA |
| Total BAs                   | Total Free BAs + Total Conjugated BAs                                                               |
| Total 12aOH BAs             | Total CA + Total DCA                                                                                |
| Total non12aOH BAs          | Total CDCA + Total LCA + Total UDCA + Total HCA + Total HDCA                                        |
| Ratio 12aOH                 | Total 12aOH BAs / Total non12aOH BAs                                                                |
| Total 6aOH BAs              | Total HCA + Total HDCA                                                                              |
| Total non6aOH BAs           | Total CA + Total CDCA + Total DCA + Total LCA + Total UDCA                                          |
| Ratio 6aOH                  | Total 6aOH BAs / Total non6aOH BAs                                                                  |

**Table S1. Definition of the bile acid clusters and ratios. BAs = Bile acids. I : Primary BA, II: Secondary BA**
